# Supplementary material for: Self-supporting carbon-rich SiOC ceramic electrodes for lithium-ion batteries and aqueous supercapacitors
Source: Royal Society of Chemistry journal article supplement (doi:10.1039/d1ra05968h), 2021-01-01
Supplement: d1ra05968h1.pdf [file d1ra05968h1.pdf]

## Self-supporting Carbon-rich SiOC Ceramic Electrodes for Lithium-ion Batteries and Aqueous Supercapacitors

Shakir Bin Mujib, François Ribot, Christel Gervais, Gurpreet Singh

### Supplementary Information

#### 1. High-resolution TEM and EDX

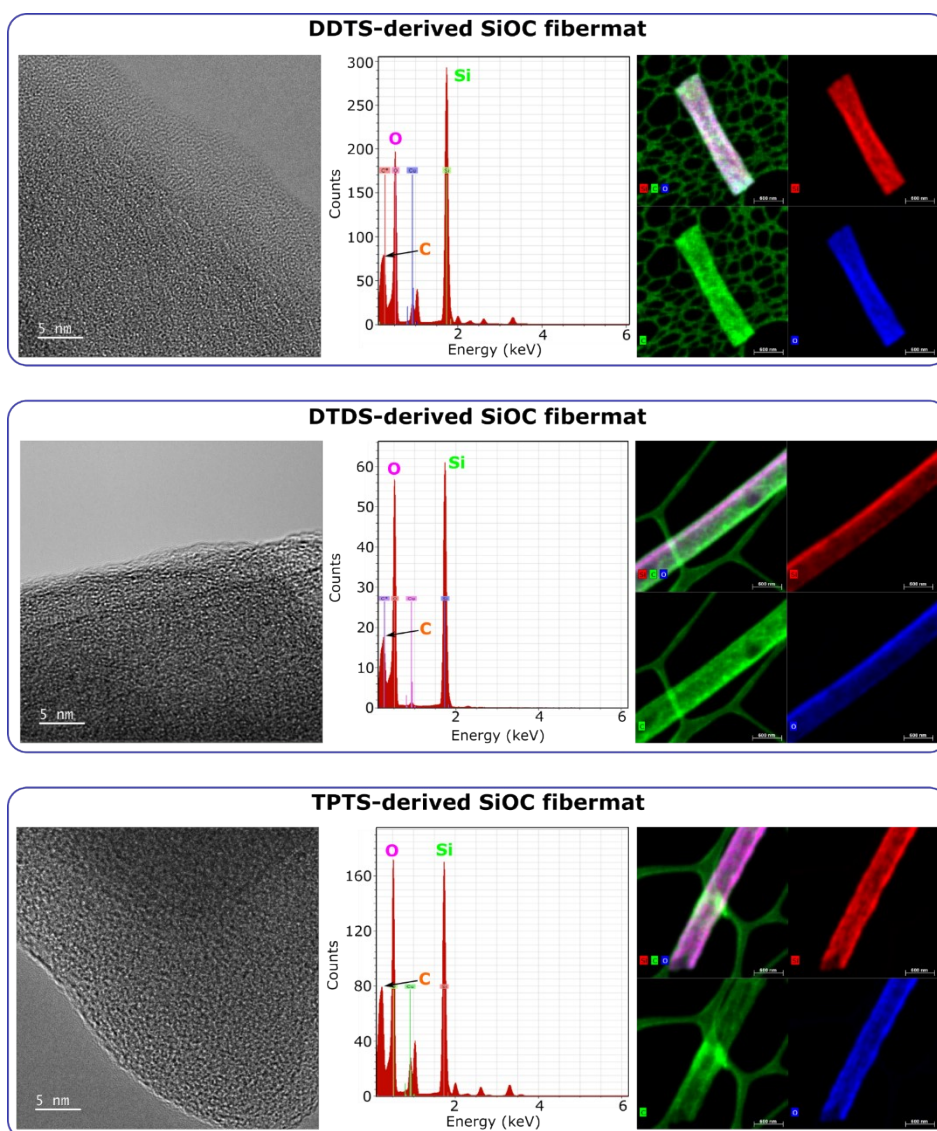

**Figure S1:** High-res TEM and corresponding EDX mappings of the SiOC fiber mats. High-res TEM reveals the amorphous structure of the PDC fiber mats. EDX elemental analysis show the presence and homogenous distribution of Si, C, and O in the three polymer-derived SiOC fiber mats.

## 2. XPS

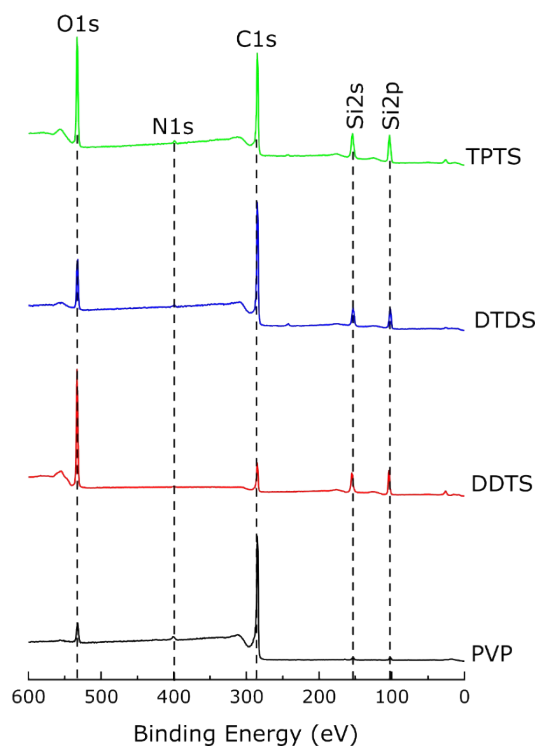

**Figure S2:** XPS spectra of the various samples pyrolyzed at 800 °C.

### 3. NMR

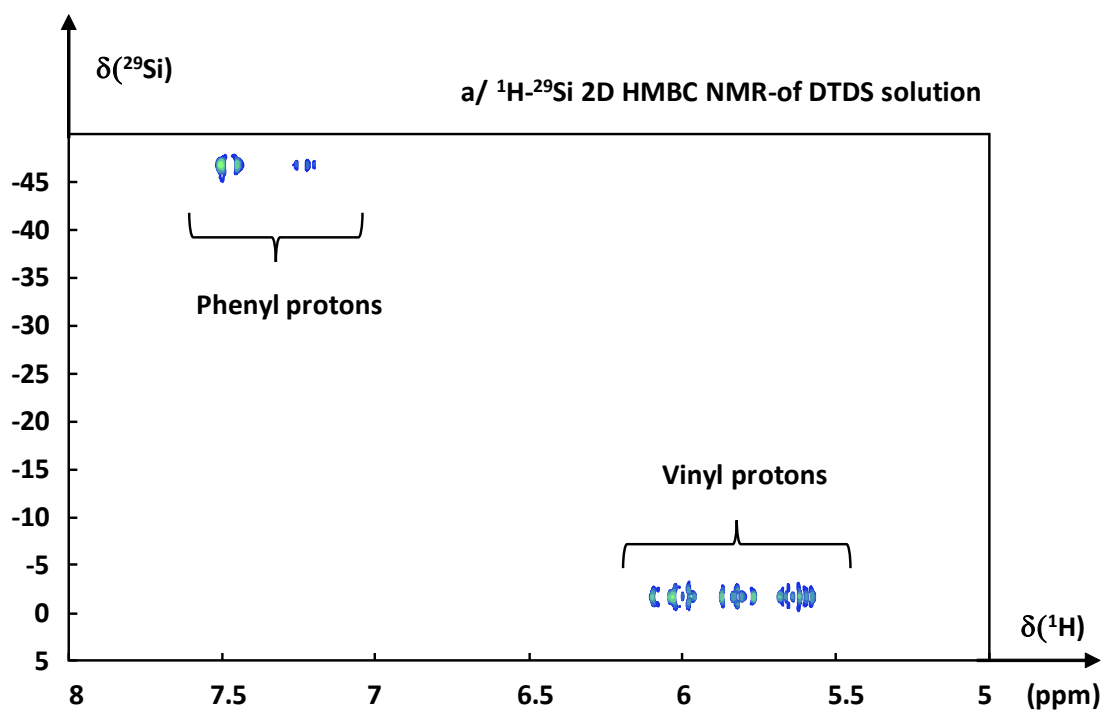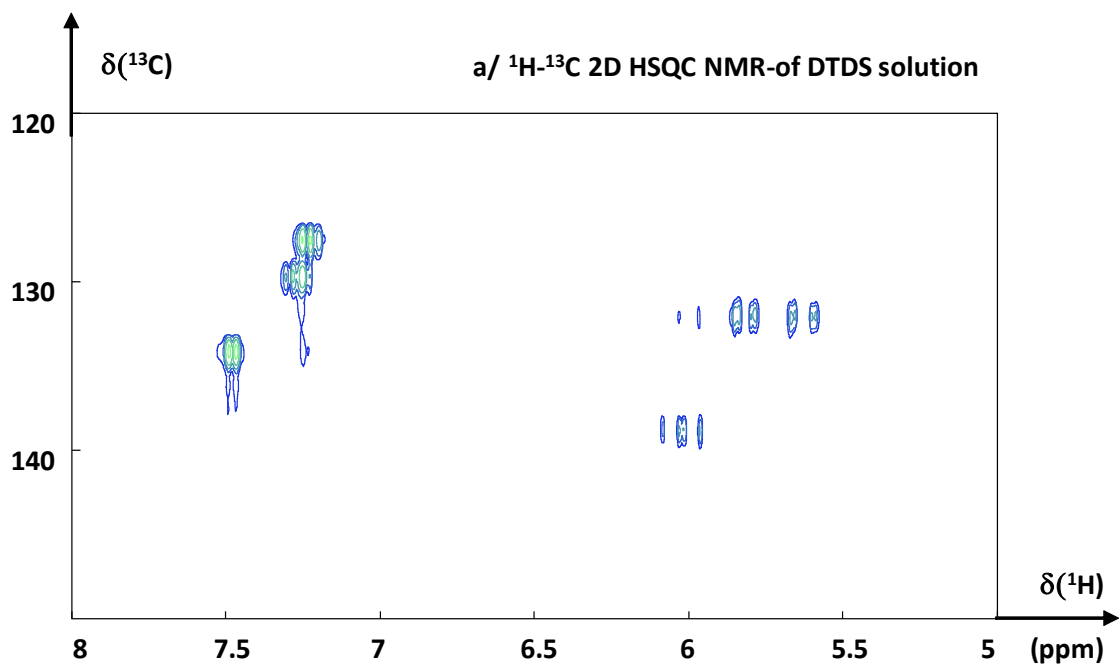

**Figure S3:** (a)  $^1\text{H}$ - $^{29}\text{Si}$ C and (b)  $^1\text{H}$ - $^{13}\text{C}$  2D NMR spectra of the DTDS electrospinning solution.

# $^{13}\text{C}$ MAS NMR-Pyrolyzed

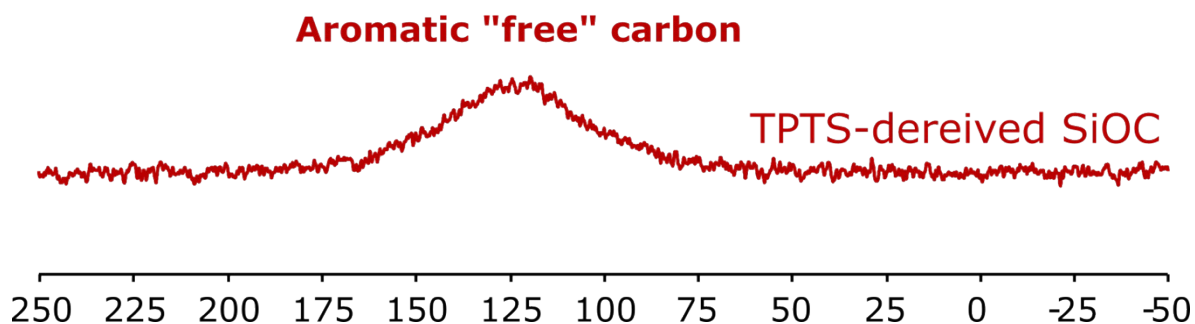

**Figure S4:**  $^{13}\text{C}$  CP MAS NMR spectrum of pyrolyzed (at  $\sim 800^\circ\text{C}$ ) TPTS-derived SiOC ceramic powders indicates the presence of typical "free carbons".

## 4. LIBs

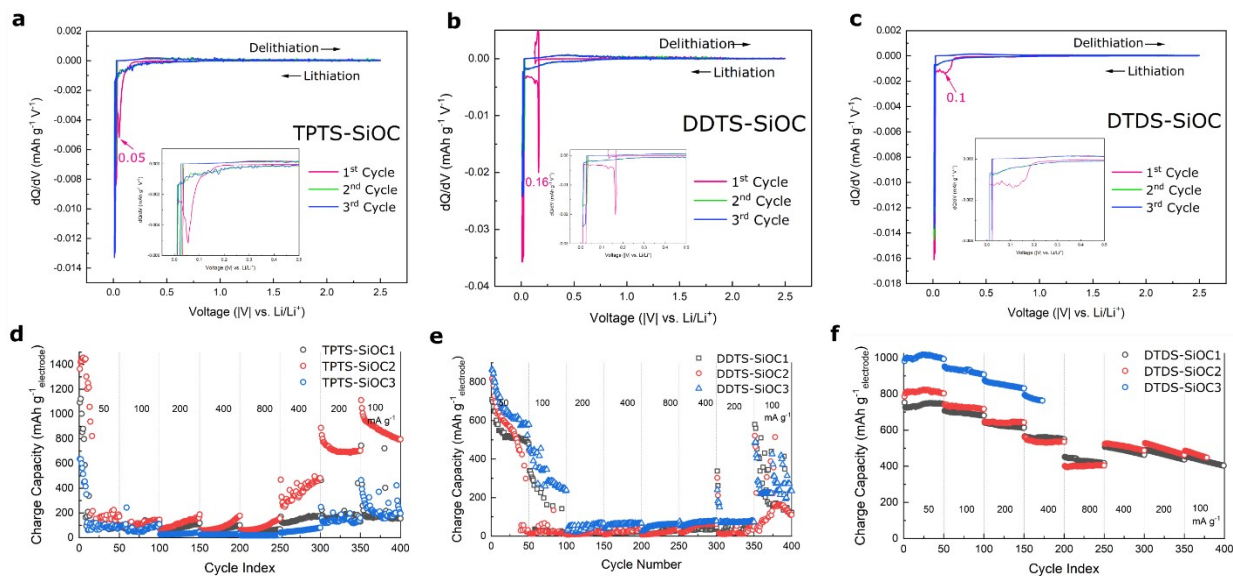

**Figure S5:** (a-c) Differential capacity curves of various SiOC electrodes show characteristic regions of reversible reactions between Li and SiOC. (d-f) Rate capability performance of three SiOC electrodes of each type shows consistent performance.

**Table S1:** Comparison of the electrochemical performance of the polymer-derived SiOC anode with reported SiOC anodes for LIBs

| Samples                  | Current density<br>(mA g <sup>-1</sup> ) | Cycles | Capacity<br>(mAh g <sup>-1</sup> ) | Ref.             |
|--------------------------|------------------------------------------|--------|------------------------------------|------------------|
| SiOC/C                   | 50                                       | 60     | 669                                | 1                |
| SiOC/graphene            | 50                                       | 90     | 582                                | 2                |
| SiOC                     | 74                                       | 30     | 460                                | 3                |
| SiOC/graphene sponge     | 100                                      | 100    | 701                                | 4                |
| SiOC                     | 36                                       | 30     | ~150                               | 5                |
| Si/SiOC                  | 100                                      | 100    | 800                                | 6                |
| SiOC/C NFs               | 100                                      | 100    | 707                                | 7                |
| SiOC/N-doped C           | 200                                      | 200    | 595                                | 8                |
| Si/SiOC/graphie          | 0.3C                                     | 100    | 637.3                              | 9                |
| 3D-GNS/SiOC <sub>f</sub> | 100                                      | 100    | 775                                | 10               |
| SiOC fibermat            | 50                                       | 50     | 800                                | <b>This work</b> |
| SiOC fibermat            | 800                                      | 250    | 450                                | <b>This work</b> |

## 5. Supercapacitors

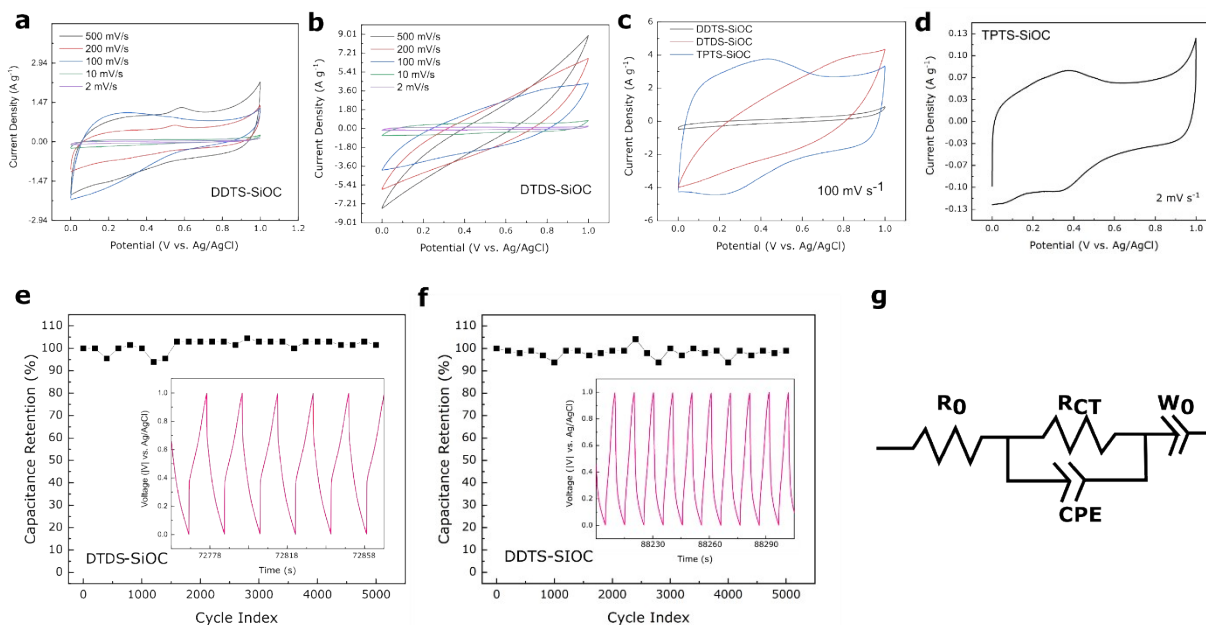

**Figure S6:** (a-b) CV profiles of the DDTS- and DTDS-derived SiOC supercapacitor electrodes at various scan rate in 1M  $\text{H}_2\text{SO}_4$  aqueous electrolyte, (c) comparison of cyclic voltammograms of various electrodes at  $100 \text{ mV s}^{-1}$ , (d) TPTS-derived SiOC supercapacitor electrodes at a scan rate of  $2 \text{ mV s}^{-1}$ , (e-f) capacitance retention trend of DTDS- and DDTS-derived SiOC electrodes show  $\sim 100\%$  retention over 5000 cycles, (g) equivalent circuit derived for the supercapacitor electrodes.

## 6. Post-cycle analysis (SEM and TEM)

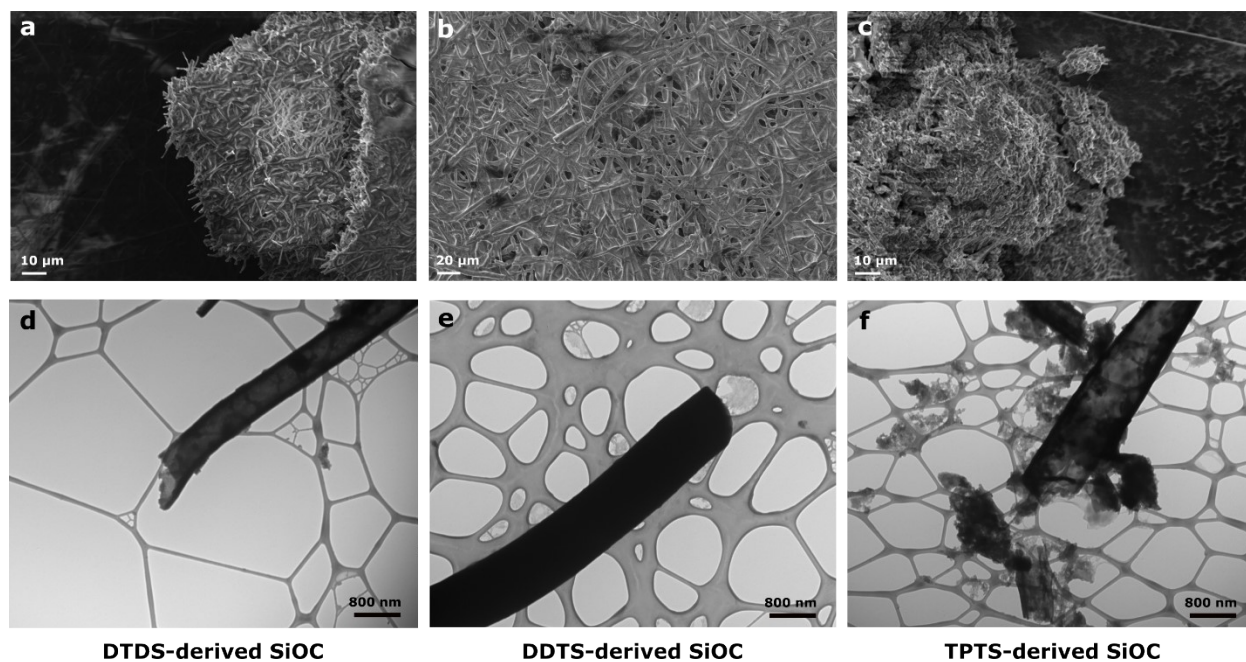

**Figure S7:** Microscopy analysis of various SiOC electrodes after 400 cycles in LIBs. (a-c) SEM images and (d-f) TEM images. TEM image of TPTS-SiOC shows the broken fiber structure presumably due to the lithiation/delithiation.

## 7. BET Surface Area Analysis

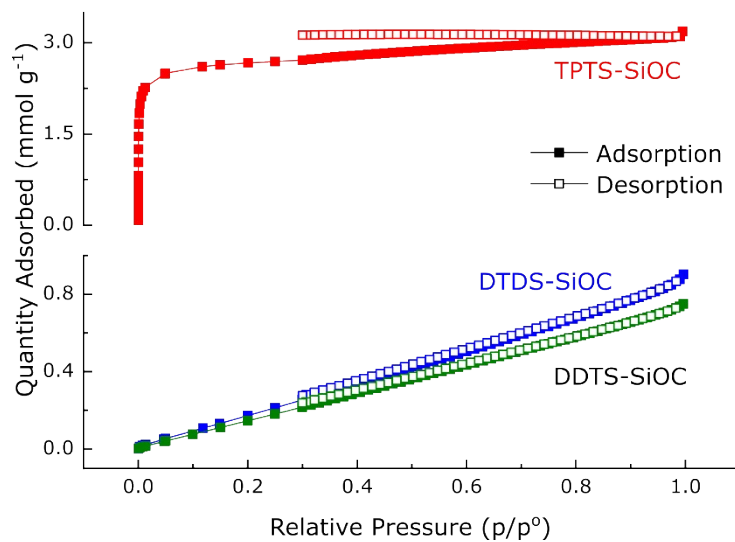

**Figure S8:** Nitrogen adsorption-desorption isotherms for the BET surface area analysis of various SiOC fibers.

**Table S2:** BET analysis results

| Samples           | BET surface area<br>(m <sup>2</sup> g <sup>-1</sup> ) | Adsorption<br>avg. pore<br>diameter<br>(Å) |
|-------------------|-------------------------------------------------------|--------------------------------------------|
| TPTS-derived SiOC | 235                                                   | 18.78                                      |
| DTDS-derived SiOC | 29                                                    | 42.46                                      |
| DDTS-derived SiOC | 26                                                    | 39.33                                      |

## Reference

1. Li, Y.; Hu, Y.; Lu, Y.; Zhang, S.; Xu, G.; Fu, K.; Li, S.; Chen, C.; Zhou, L.; Xia, X.; Zhang, X., One-dimensional SiOC/C composite nanofibers as binder-free anodes for lithium-ion batteries. *Journal of Power Sources* **2014**, *254*, 33-38.
2. Ren, Y.; Yang, B.; Huang, X.; Chu, F.; Qiu, J.; Ding, J., Intercalated SiOC/graphene composites as anode material for li-ion batteries. *Solid State Ionics* **2015**, *278*, 198-202.
3. Kaspar, J.; Graczyk-Zajac, M.; Choudhury, S.; Riedel, R., Impact of the electrical conductivity on the lithium capacity of polymer-derived silicon oxycarbide (SiOC) ceramics. *Electrochimica Acta* **2016**, *216*, 196-202.
4. Sang, Z.; Zhao, Z.; Su, D.; Miao, P.; Zhang, F.; Ji, H.; Yan, X., SiOC nanolayer wrapped 3D interconnected graphene sponge as a high-performance anode for lithium ion batteries. *Journal of Materials Chemistry A* **2018**, *6* (19), 9064-9073.
5. Dibandjo, P.; Graczyk-Zajac, M.; Riedel, R.; Pradeep, V. S.; Soraru, G. D., Lithium insertion into dense and porous carbon-rich polymer-derived SiOC ceramics. *Journal of the European Ceramic Society* **2012**, *32* (10), 2495-2503.
6. Wu, Z.; Lv, W.; Cheng, X.; Gao, J.; Qian, Z.; Tian, D.; Li, J.; He, W.; Yang, C., A Nanostructured Si/SiOC Composite Anode with Volume-Change-Buffering Microstructure for Lithium-Ion Batteries. *Chemistry – A European Journal* **2019**, *25* (10), 2604-2609.
7. Huang, X.; Christopher, B.; Chai, S.; Xie, X.; Luo, S.; Liang, S.; Pan, A., Cowpea-like N-Doped Silicon Oxycarbide/Carbon Nanofibers as Anodes for High-Performance Lithium-Ion Batteries. *ACS Applied Energy Materials* **2021**, *4* (2), 1677-1686.
8. Ma, M.; Wang, H.; Li, X.; Peng, K.; Xiong, L.; Du, X., Free-standing SiOC/nitrogen-doped carbon fibers with highly capacitive Li storage. *Journal of the European Ceramic Society* **2020**, *40* (15), 5238-5246.
9. WANG Jian-Tao, W. Y., HUANG Bin, YANG Juan-Yu, TAN Ao, LU Shi-Gang, Silicon Supported on Stable Si-O-C Skeleton in High-Performance Lithium-Ion Battery Anode Materials. *Acta Phys. -Chim. Sin.* **2014**, *30* (2), 305-310.
10. Sang, Z.; Yan, X.; Wen, L.; Su, D.; Zhao, Z.; Liu, Y.; Ji, H.; Liang, J.; Dou, S. X., A graphene-modified flexible SiOC ceramic cloth for high-performance lithium storage. *Energy Storage Materials* **2020**, *25*, 876-884.
